# Supplementary material for: Determination of microcystins in water samples by deep eutectic solvent-based vortex-assisted liquid–liquid microextraction coupled with ultrahigh-performance liquid chromatography-high resolution mass spectrometry
Source: Royal Society of Chemistry journal article supplement (doi:10.1039/c9ra07544e), 2019-01-01
Supplement: c9ra07544e1.pdf [file c9ra07544e1.pdf]

## **Supplementary Material**

**Determination of microcystins in water samples by deep eutectic solvent-based vortex-assisted liquid-liquid microextraction coupled with ultrahigh-performance liquid chromatography-high resolution mass spectrometry**

**Yung-Chih Chen, Yi-Ting Ao, Wang-Hsien Ding\***

**Department of Chemistry, National Central University,  
Chung-Li 320, Taiwan**

**Table S1.** Name (abbreviation), chemical structure and molecular weight of MC-LR and MC-YR

| Name<br>(Abbreviation):           | Structure                                                                          | MW<br>(g/mol)    | $pK_a$     | $\log K_{ow}$ |
|-----------------------------------|------------------------------------------------------------------------------------|------------------|------------|---------------|
| <b>Microcystin-LR<br/>(MC-LR)</b> | 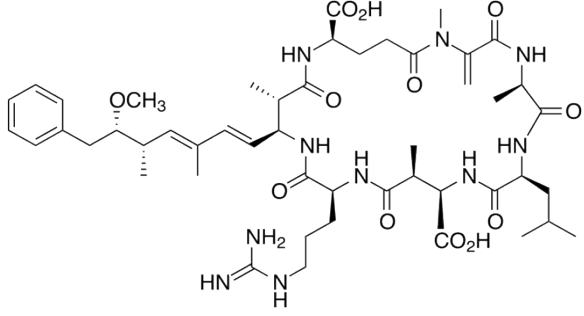  | <b>994.5488</b>  | <b>3.3</b> | <b>4.2</b>    |
| <b>Microcystin-YR<br/>(MC-YR)</b> |  | <b>1044.5280</b> | <b>3.9</b> | <b>3.4</b>    |

**Table S2.** Analysis of variance (ANOVA) of the Box-Behnken design for MC-LR peak areas

| Source                   | Sum of Squares | df | Mean Square | F Value | p-value<br>Prob > F | Coefficient <sup>a</sup><br>(estimated) |
|--------------------------|----------------|----|-------------|---------|---------------------|-----------------------------------------|
| Model                    | 6.37E+09       | 9  | 7.07E+08    | 15.02   | 0.0009*             |                                         |
| Intercept                |                |    |             |         |                     | 1.12E+05                                |
| A-THF volume             | 2.61E+07       | 1  | 2.61E+07    | 0.55    | 0.481               | -1806                                   |
| B-DES volume             | 3.12E+09       | 1  | 3.12E+09    | 67.12   | < 0.0001*           | 19882                                   |
| C-vortex time            | 4.27E+07       | 1  | 4.27E+07    | 0.91    | 0.3726              | 2311                                    |
| AB                       | 1.81E+08       | 1  | 1.81E+08    | 3.85    | 0.09                | 6736                                    |
| AC                       | 7.24E+07       | 1  | 7.24E+07    | 1.54    | 0.2552              | -4253                                   |
| BC                       | 2.06E+06       | 1  | 2.06E+06    | 0.044   | 0.8402              | -718                                    |
| A <sup>2</sup>           | 6.34E+08       | 1  | 6.34E+08    | 13.47   | 0.008               | -12275                                  |
| B <sup>2</sup>           | 1.51E+09       | 1  | 1.51E+09    | 32.16   | 0.0008              | -18969                                  |
| C <sup>2</sup>           | 4.53E+08       | 1  | 4.53E+08    | 9.61    | 0.0173              | -10371                                  |
| Residual                 | 3.30E+08       | 7  | 4.71E+07    |         |                     |                                         |
| Lack of Fit              | 1.35E+08       | 3  | 4.50E+07    | 0.92    | 0.5065              |                                         |
| R <sup>2</sup>           | 0.9508         |    |             |         |                     |                                         |
| Adjusted R <sup>2</sup>  | 0.9078         |    |             |         |                     |                                         |
| Predicted R <sup>2</sup> | 0.8852         |    |             |         |                     |                                         |

\*Significant

<sup>a</sup> The estimated coefficients for the second order polynomial equation.

**Table S3.** Analysis of variance (ANOVA) of the Box-Behnken design for MC-YR peak areas

| Source                   | Sum of Squares | df | Mean Square | F Value | p-value Prob > F | Coefficient <sup>a</sup> (estimated) |
|--------------------------|----------------|----|-------------|---------|------------------|--------------------------------------|
| Model                    | 6.17E+09       | 9  | 6.86E+08    | 15.0    | 0.0009*          |                                      |
| Intercept                |                |    |             |         |                  | 1.12E+05                             |
| A-THF volume             | 2.87E+07       | 1  | 2.87E+07    | 0.63    | 0.4544           | -1893                                |
| B-DES volume             | 2.99E+09       | 1  | 2.99E+09    | 65.40   | < 0.0001*        | 19336                                |
| C-vortex time            | 5.29E+07       | 1  | 5.29E+07    | 1.16    | 0.3180           | 2571                                 |
| AB                       | 1.32E+08       | 1  | 1.32E+08    | 2.88    | 0.1332           | 5743                                 |
| AC                       | 6.07E+07       | 1  | 6.07E+07    | 1.33    | 0.2870           | -3897                                |
| BC                       | 2.48E+06       | 1  | 2.48E+06    | 0.054   | 0.8225           | -788                                 |
| A <sup>2</sup>           | 6.37E+08       | 1  | 6.37E+08    | 13.92   | 0.0073           | -12296                               |
| B <sup>2</sup>           | 1.54E+09       | 1  | 1.54E+09    | 33.66   | 0.0007           | -19122                               |
| C <sup>2</sup>           | 4.50E+08       | 1  | 4.50E+08    | 9.85    | 0.0164           | -10343                               |
| Residual                 | 3.20E+08       | 7  | 4.57E+07    |         |                  |                                      |
| Lack of Fit              | 1.11E+08       | 3  | 3.70E+07    | 0.71    | 0.5951           |                                      |
| R <sup>2</sup>           | 0.9507         |    |             |         |                  |                                      |
| Adjusted R <sup>2</sup>  | 0.9080         |    |             |         |                  |                                      |
| Predicted R <sup>2</sup> | 0.8873         |    |             |         |                  |                                      |

\*Significant

<sup>a</sup> The estimated coefficients for the second order polynomial equation.

**Table S4.** The variation of peak abundances:  
(+) peak enhancement/(-) peak suppression

| Analytes | (+) peak enhancement/<br>(-) peak suppression (%) |
|----------|---------------------------------------------------|
| MC-YR    | +11*                                              |
| MC-LR    | +17                                               |

\*The percentage of the “average peak abundances difference” (n = 3) obtained from the final extract divided by the peak abundance from the standard solution (5 ng/mL).

**Table S5.** Concentrations (ng/mL) of MC-YR and MC-LR detected in water samples from Shihmen Reservoir by using DES-VALLME coupled with UHPLC-qTOF-MS

| Sample                   | MC-YR                               | MC-LR                               |
|--------------------------|-------------------------------------|-------------------------------------|
| <b>Reservoir-1</b>       | n.d.                                | n.d.                                |
| <b>Spiked recovery %</b> | 105 <sup>a</sup> (3.6) <sup>b</sup> | 109 <sup>a</sup> (3.2) <sup>b</sup> |
| <b>Reservoir-2</b>       | n.d.                                | n.d.                                |
| <b>Spiked recovery %</b> | 106 (7.6)                           | 98 (3.7)                            |
| <b>Reservoir-3</b>       | n.d.                                | n.d.                                |
| <b>Spiked recovery %</b> | 100 (12.2)                          | 94.0 (10.4)                         |
| <b>Reservoir-4</b>       | n.d.                                | n.d.                                |
| <b>Spiked recovery %</b> | 98.7 (4.5)                          | 95.6 (5.7)                          |

n.d.: not detected.

<sup>a</sup> Average spiked recovery (trueness, %, n = 3; spiked final concentration: 2.0 ng/mL).

<sup>b</sup> Relative standard deviation (RSD) of spiked recovery (precision, %, n = 3).

**Table S6.** The penalty points for MC-YR and MC-LR determination by DES-VALLME plus UHPLC-ESI(+)-qTOF-MS

| Reagents                                     | penalty points |
|----------------------------------------------|----------------|
| THF                                          | 1              |
| Acetonitrile                                 | 1              |
| Methanol                                     | 1              |
| DES                                          | 1              |
| Formic acid                                  | 2              |
| <hr/>                                        |                |
| Instruments                                  |                |
| LC-MS                                        | 2              |
| Centrifuge                                   | 1              |
| Vortex agitator                              | 1              |
| Waste                                        | 2              |
| Total penalty points                         | 12             |
| <hr/>                                        |                |
| <b>Analytical Eco-scale total score = 88</b> |                |

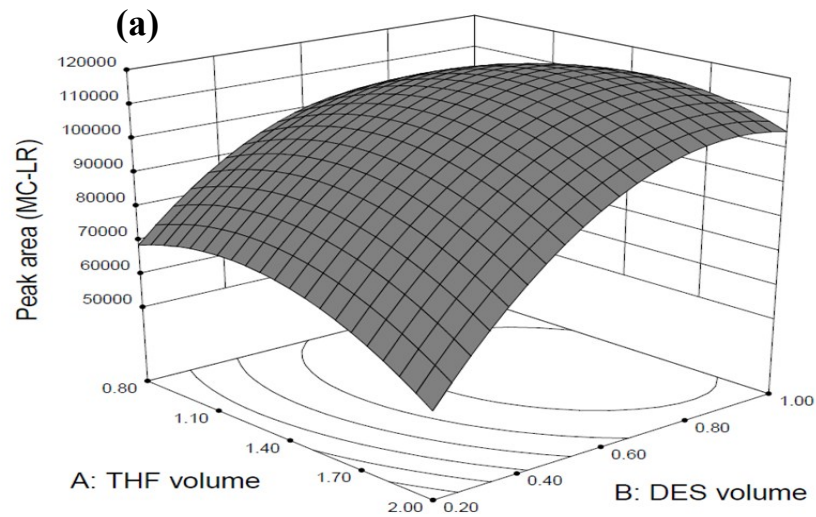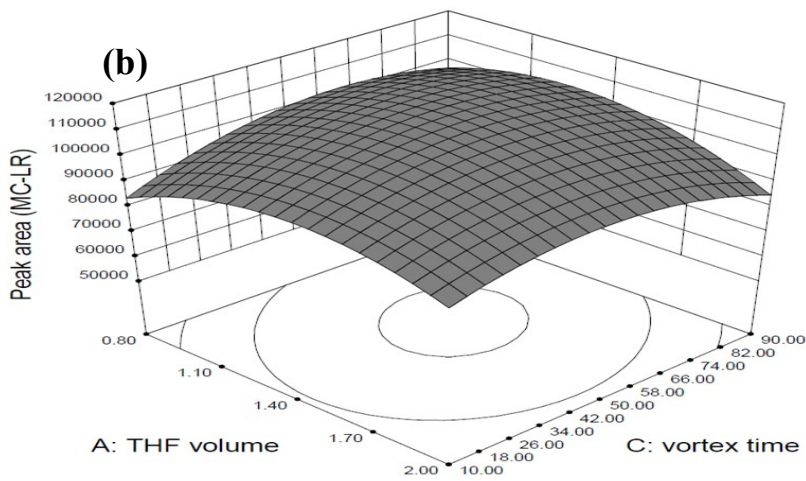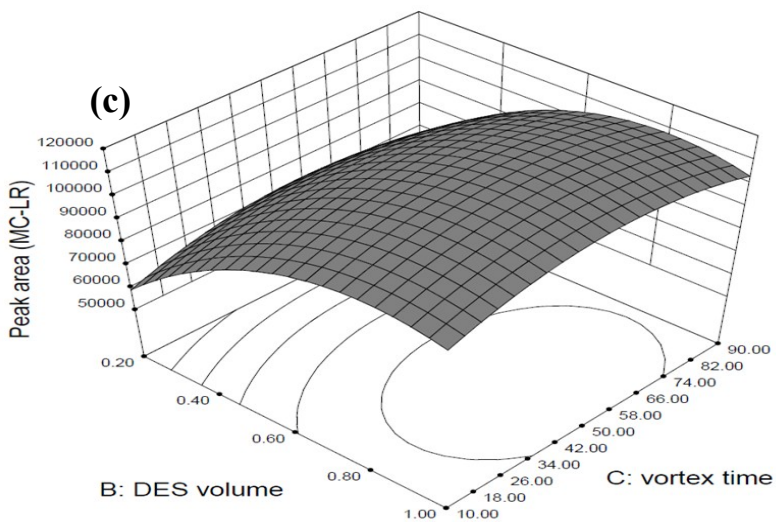

**Figure S1.** 3D response surface plots for peak area of MC-LR estimated from the BBD on each pair of independent variables: (a) volume of THF vs. volume of DES; (b) volume of THF vs. vortex-time; (c) volume of DES vs. vortex-time.

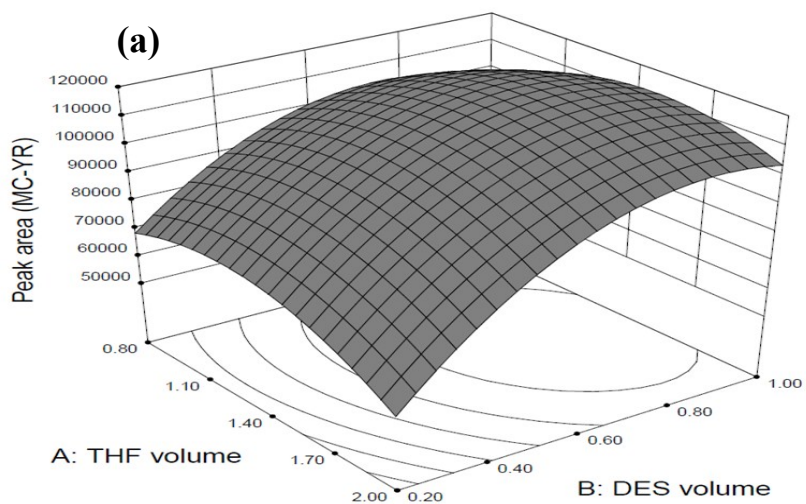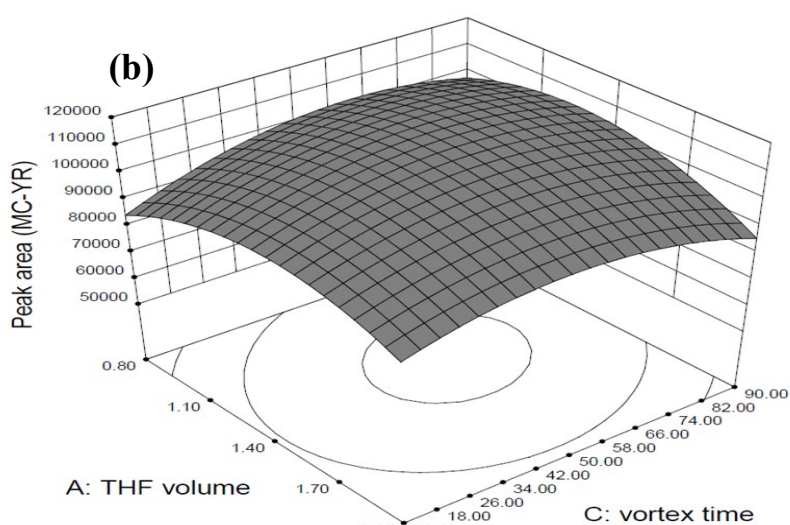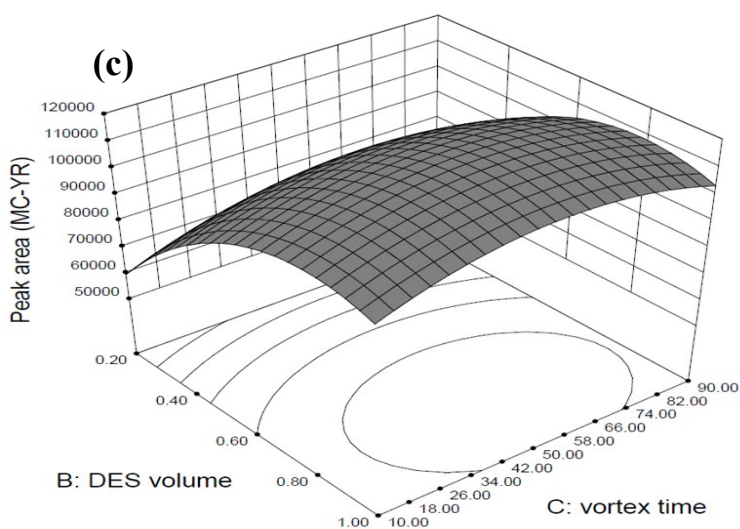

**Figure S2.** 3D response surface plots for peak area of MC-LR estimated from the BBD on each pair of independent variables: (a) volume of THF vs. volume of DES; (b) volume of THF vs. vortex-time; (c) volume of DES vs. vortex-time.



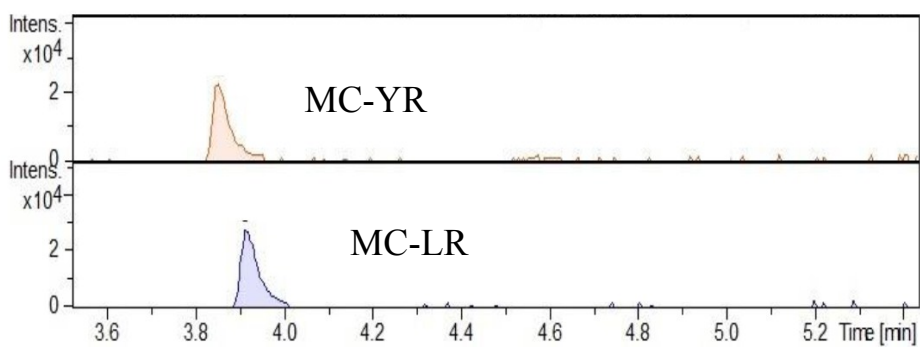

**Figure S3.** UHPLC-ESI(+)-qTOF-MS extracted ion chromatograms for a spiked water sample from “Reservoir” (spiked at the final concentrations of 2 ng/mL for each analyte).
